# Supplementary material
Source: bioRxiv or medRxiv preprint supplement (https://www.biorxiv.org/highwire/filestream/126970/field_highwire_adjunct_files/0/422675-1.pdf)

Figure 1.

### 5hmC Similarity to Histone Map

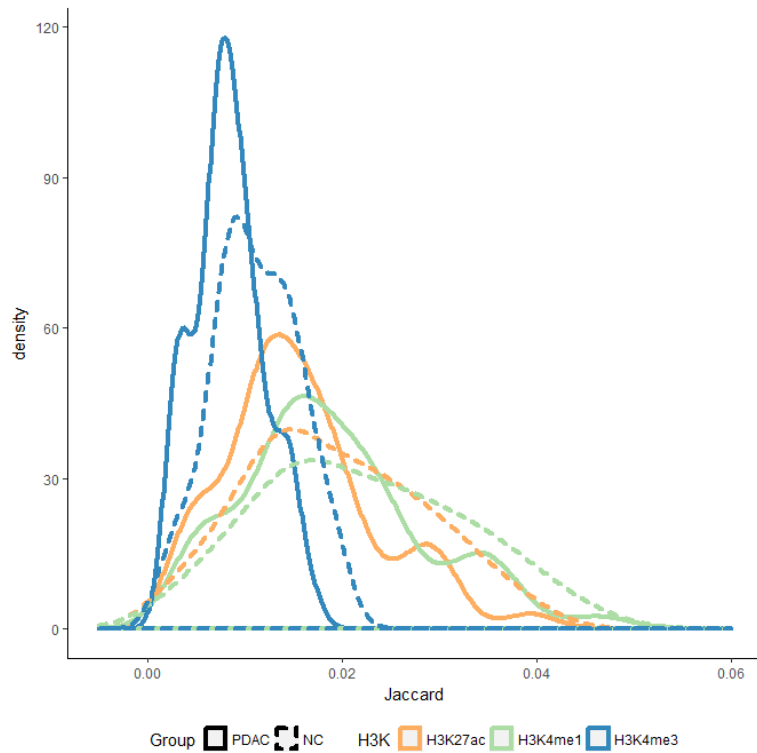

Figure 2

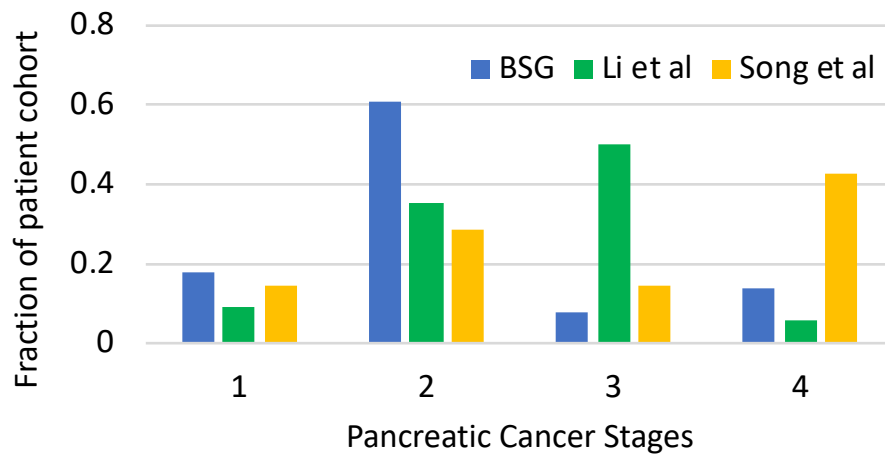

Supplement: Supplementary file [file 422675-1.pdf]
